# Supplementary material for: PANDORA-seq expands the repertoire of regulatory small RNAs by overcoming RNA modifications
Source: Springer Nature journal article supplement (doi:10.1038/s41556-021-00652-7), 2021-04-01
Supplement: MOESM6 [file 41556_2021_652_MOESM6_ESM.xlsx]

## Sheet: Figure 2
Source Data for Figure 2f: The tsRNA/miRNA expression ratio under different treatment among mouse and human tissues/cells
tissue/cell	treatment	relative_exp_rep-1	relative_exp_rep-2	relative_exp_rep-3
Mouse brain	Traditional	0.0161365	0.0230245	0.023413
Mouse brain	AlkB (+)	0.0906521	0.156838	0.109154
Mouse brain	T4PNK (+)	0.187689	0.414005	0.183836
Mouse brain	PANDORA-seq	1.01874	0.644094	0.33152
Mouse liver	Traditional	0.0037232	0.00746521	0.00274453
Mouse liver	AlkB (+)	0.00641626	0.00508379	0.00231921
Mouse liver	T4PNK (+)	0.0808763	0.146727	0.101561
Mouse liver	PANDORA-seq	0.1203	0.153875	0.0867392
Mouse mature sperm	Traditional	3.69034	2.72463	1.97111
Mouse mature sperm	AlkB (+)	5.76863	9.93512	5.95085
Mouse mature sperm	T4PNK (+)	6.78711	7.02698	5.70581
Mouse mature sperm	PANDORA-seq	11.2495	11.7292	11.583
Mouse mature sperm head	Traditional	13.9164	20.3397	10.7918
Mouse mature sperm head	PANDORA-seq	63.6869	70.9576	53.0249
Mouse embryonic stem cell (mESC)	Traditional	0.0491438	0.0449648	0.0454124
Mouse embryonic stem cell (mESC)	AlkB (+)	0.226929	0.187385	0.267731
Mouse embryonic stem cell (mESC)	T4PNK (+)	1.99245	1.94466	1.77552
Mouse embryonic stem cell (mESC)	PANDORA-seq	3.01841	5.62374	3.04086
Human HeLa cell	Traditional	0.0988587	0.0861703	0.0596334
Human HeLa cell	AlkB (+)	0.0941147	0.205059	0.0402975
Human HeLa cell	T4PNK (+)	4.19006	3.88395	5.04636
Human HeLa cell	PANDORA-seq	3.51786	3.23801	5.12079
Statistics for Figure 2f: Statistic analysis for tsRNA/miRNA expression ratio under different treatment among mouse and human tissues/cells (one-way ANOVA (uncorrected Fisher’s LSD test))
tissue/cell	treatment_1	treatment_2	mean_1	sem_1	n_1	mean_2	sem_2	n_2	two sided p-value	signif.
Mouse brain	Traditional	AlkB (+)	0.020858	0.00236342	3	0.118881	0.0197155	3	0.5346
Mouse brain	Traditional	T4PNK (+)	0.020858	0.00236342	3	0.261843	0.076089	3	0.1493
Mouse brain	Traditional	PANDORA-seq	0.020858	0.00236342	3	0.664786	0.198653	3	0.0028	**
Mouse brain	AlkB (+)	T4PNK (+)	0.118881	0.0197155	3	0.261843	0.076089	3	0.3717
Mouse brain	AlkB (+)	PANDORA-seq	0.118881	0.0197155	3	0.664786	0.198653	3	0.0068	**
Mouse brain	T4PNK (+)	PANDORA-seq	0.261843	0.076089	3	0.664786	0.198653	3	0.0285	*
Mouse liver	Traditional	AlkB (+)	0.00464431	0.00143846	3	0.00460642	0.00120656	3	0.9985
Mouse liver	Traditional	T4PNK (+)	0.00464431	0.00143846	3	0.109721	0.0194423	3	0.0006	***
Mouse liver	Traditional	PANDORA-seq	0.00464431	0.00143846	3	0.120305	0.0193805	3	0.0003	***
Mouse liver	AlkB (+)	T4PNK (+)	0.00460642	0.00120656	3	0.109721	0.0194423	3	0.0006	***
Mouse liver	AlkB (+)	PANDORA-seq	0.00460642	0.00120656	3	0.120305	0.0193805	3	0.0003	***
Mouse liver	T4PNK (+)	PANDORA-seq	0.109721	0.0194423	3	0.120305	0.0193805	3	0.6013
Mouse mature sperm	Traditional	AlkB (+)	2.79536	0.497556	3	7.2182	1.35948	3	0.0032	**
Mouse mature sperm	Traditional	T4PNK (+)	2.79536	0.497556	3	6.50663	0.406356	3	0.0084	**
Mouse mature sperm	Traditional	PANDORA-seq	2.79536	0.497556	3	11.5205	0.141951	3	0	***
Mouse mature sperm	AlkB (+)	T4PNK (+)	7.2182	1.35948	3	6.50663	0.406356	3	0.524
Mouse mature sperm	AlkB (+)	PANDORA-seq	7.2182	1.35948	3	11.5205	0.141951	3	0.0038	**
Mouse mature sperm	T4PNK (+)	PANDORA-seq	6.50663	0.406356	3	11.5205	0.141951	3	0.0016	**
Mouse mature sperm head	Traditional	PANDORA-seq	15.0159	2.81053	3	62.5565	5.2075	3	0.0013	**
Mouse embryonic stem cell (mESC)	Traditional	AlkB (+)	0.046507	0.00132474	3	0.227348	0.0231948	3	0.7757
Mouse embryonic stem cell (mESC)	Traditional	T4PNK (+)	0.046507	0.00132474	3	1.90421	0.0658086	3	0.0164	*
Mouse embryonic stem cell (mESC)	Traditional	PANDORA-seq	0.046507	0.00132474	3	3.89434	0.864727	3	0.0002	***
Mouse embryonic stem cell (mESC)	AlkB (+)	T4PNK (+)	0.227348	0.0231948	3	1.90421	0.0658086	3	0.0257	*
Mouse embryonic stem cell (mESC)	AlkB (+)	PANDORA-seq	0.227348	0.0231948	3	3.89434	0.864727	3	0.0003	***
Mouse embryonic stem cell (mESC)	T4PNK (+)	PANDORA-seq	1.90421	0.0658086	3	3.89434	0.864727	3	0.0118	*
Human HeLa cell	Traditional	AlkB (+)	0.0815541	0.0115562	3	0.113157	0.0485063	3	0.9495
Human HeLa cell	Traditional	T4PNK (+)	0.0815541	0.0115562	3	4.37345	0.347863	3	0	***
Human HeLa cell	Traditional	PANDORA-seq	0.0815541	0.0115562	3	3.95889	0.586541	3	0	***
Human HeLa cell	AlkB (+)	T4PNK (+)	0.113157	0.0485063	3	4.37345	0.347863	3	0	***
Human HeLa cell	AlkB (+)	PANDORA-seq	0.113157	0.0485063	3	3.95889	0.586541	3	0	***
Human HeLa cell	T4PNK (+)	PANDORA-seq	4.37345	0.347863	3	3.95889	0.586541	3	0.4161
